# Supplementary material
Source: PubMed Central journal article supplement (PMC2785698)
Supplement: supp_M109.031849_jbc.M109.031849-1.pdf [file supp_M109.031849_jbc.M109.031849-1.pdf]

## Supplemental Figure 1

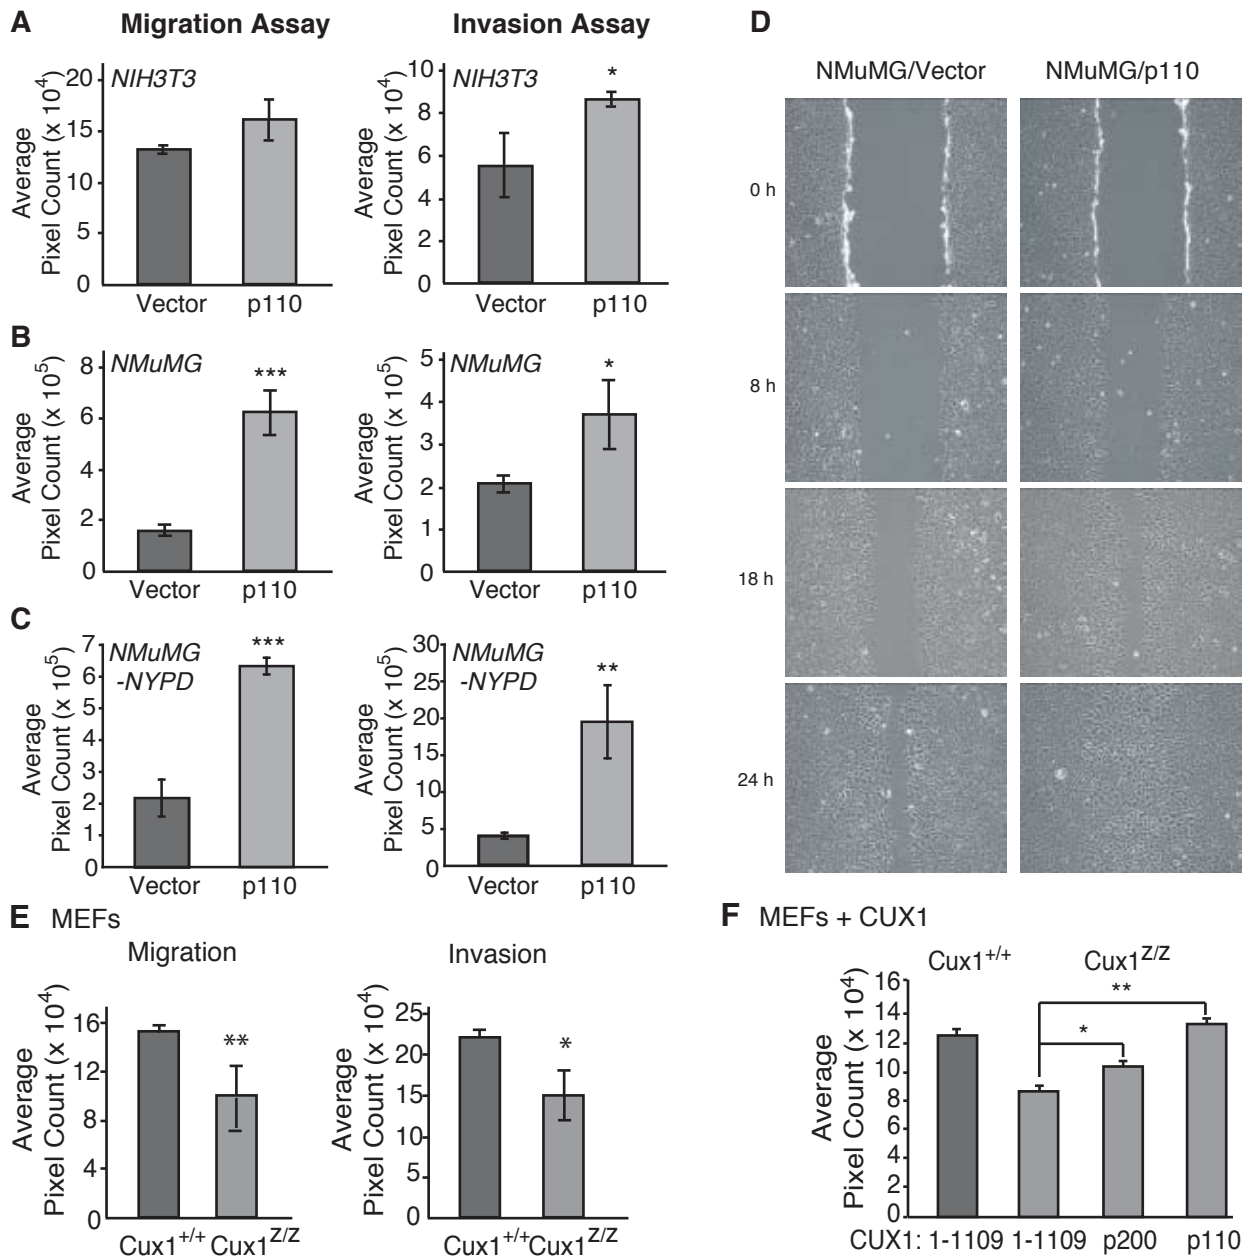

### Supplemental Figure 1

#### p110 CUX1 stimulates migration and invasion in various cell lines

(A), (B) and (C) Populations of cells stably carrying a retroviral vector, either empty or expressing p110 CUX1, were submitted to two-chamber migration and invasion assays. (A) Murine fibroblastic NIH3T3 cells. (B) Murine mammary epithelial NMuMG cells. (C) NMuMG-NYPD cells that express the NYPD erbB2 mutant. Each experiment was done in triplicate, and the graphs represent an average of the 3 wells.

(D) Wound healing assay was performed using NMuMG/Vector and NMuMG/p110 cell populations. Scratches were done on highly confluent cells and closure was monitored by taking pictures at different time points. Representative results from at least three independent experiments are presented. \*, 0.05 > pValue > 0.01; \*\*, 0.01 > pValue > 0.001; \*\*\*, pValue < 0.001.

(E) Wild type (Cux1<sup>+/+</sup>) and CUX1 deficient (Cux1<sup>Z/Z</sup>) MEFs were submitted to two-chamber assays either without or with a matrigel coating to evaluate their migration and invasion ability, respectively. 80 000 cells were plated at the top of the chamber in medium without serum, and 10% FBS medium was placed at the bottom of the chamber. After 16 h incubation at 37 °C, cells were fixed in 10% formalin and stained with 0.1% crystal violet. Top cells were removed and the average pixel count was measured to evaluate the number of migrating cells.

(F) CUX1<sup>Z/Z</sup> MEFs were infected with adenoviral vectors expressing p200 CUX1, p110 CUX1 or, as a control, a recombinant CUX1 protein that does not localize to the nucleus, 1-1109. In parallel, CUX1<sup>+/+</sup> MEFs were infected with the CUX1(1-1109) adenoviral vector. A two-chamber migration assay with a matrigel coating was performed as described in (D).

**Supplementary Table 2: Putative targets of p110 CUX1 that are involved in cell motility.** A list of putative targets of CUX1 was established from genome-wide location arrays performed in cell lines of various cell types (Supplemental data, Table 1). Genes were classified into functional categories using programs from DAVID ([http://niaid.abcc.ncifcrf.gov/content.jsp?file=functional\\_annotation.html#intro](http://niaid.abcc.ncifcrf.gov/content.jsp?file=functional_annotation.html#intro)) (left column). Genes with a function related to migration and invasion are shown. Their full name and symbol are indicated. P-values from the location arrays are indicated in the right column.

| Function                        | SYMBOL                                     | Gene Name                                                         | p Value |
|---------------------------------|--------------------------------------------|-------------------------------------------------------------------|---------|
| GTPases<br>Related<br>Proteins  | ARHGEF7                                    | Rho guanine nucleotide exchange factor (GEF) 7                    | 9,7E-5  |
|                                 | ARHGAP6                                    | Rho GTPase activating protein 6                                   | 2,0E-3  |
|                                 | ARHGAP11A                                  | similar to human GTPase-activating protein                        | 6,6E-4  |
|                                 | ARHGAP21                                   | Rho GTPase activating protein 21                                  | 4,5E-3  |
|                                 | ARHGAP18                                   | Rho GTPase activating protein 18                                  | 1,9E-3  |
|                                 | ARHGDIB                                    | Rho GDP dissociation inhibitor (GDI) beta                         | 4,7E-12 |
|                                 | ARHGEF2                                    | rho/rac guanine nucleotide exchange factor (GEF) 2                | 1,5E-3  |
|                                 | ARHGEF10                                   | Rho guanine nucleotide exchange factor (GEF) 10                   | 1,1E-3  |
|                                 | ACK1                                       | activated Cdc42-associated kinase 1                               | 1,5E-3  |
|                                 | CDC42                                      | cell division cycle 42 (GTP binding protein, 25kDa)               | 6,7E-4  |
|                                 | GRAF                                       | GTPase regulator associated with focal adhesion kinase pp125(FAK) | 1,4E-5  |
|                                 | MARCKS                                     | myristoylated alanine-rich protein kinase C substrate             | 1,2E-4  |
|                                 | RAB36                                      | RAB36, member RAS oncogene family                                 | 5,5E-5  |
|                                 | RAIN                                       | Ras-interacting protein                                           | 1,4E-3  |
|                                 | RAP1A                                      | RAP1A, member of RAS oncogene family                              | 8,7E-5  |
|                                 | RHOBTB3                                    | Rho-related BTB domain containing 3                               | 4,0E-3  |
| RAC2                            | ras-related C3 botulinum toxin substrate 2 | 7,4E-4                                                            |         |
| RACGAP1                         | Rac GTPase activating protein 1            | 8,4E-4                                                            |         |
| RICS                            | Rho GTPase-activating protein              | 5,9E-4                                                            |         |
| Cell<br>Adhesion<br>Proteins    | CLDN12                                     | claudin 12                                                        | 4,0E-3  |
|                                 | CLDN17                                     | claudin 17                                                        | 1,7E-3  |
|                                 | CLDN4                                      | claudin 4                                                         | 1,3E-3  |
|                                 | CTNNA3                                     | catenin (cadherin-associated protein), alpha 3                    | 7,1E-6  |
|                                 | GJA10                                      | gap junction protein, alpha 10, 59kDa                             | 2,0E-3  |
|                                 | ITGBL1                                     | integrin, beta-like 1 (with EGF-like repeat domains)              | 3,2E-4  |
|                                 | ITGB1BP2                                   | integrin beta 1 binding protein (melusin) 2                       | 6,0E-4  |
|                                 | ITGB1                                      | integrin, beta 1                                                  | 4,8E-3  |
|                                 | ITGB3BP                                    | integrin beta 3 binding protein (beta3-endonexin)                 | 3,6E-4  |
|                                 | ITGB2                                      | integrin, beta 2 (antigen CD18 (p95))                             | 7,7E-4  |
|                                 | ITGB7                                      | integrin, beta 7                                                  | 1,3E-3  |
|                                 | OCLN                                       | occludin                                                          | 2,9E-4  |
|                                 | PCDH10                                     | protocadherin 10                                                  | 4,5E-3  |
|                                 | PNN                                        | pinin, desmosome associated protein                               | 2,2E-6  |
|                                 | PTK2                                       | PTK2 protein tyrosine kinase 2                                    | 1,2E-3  |
|                                 | TJP4                                       | tight junction protein 4 (peripheral)                             | 9,4E-4  |
| ALCAM                           | activated leukocyte cell adhesion molecule | 2,4E-3                                                            |         |
| TM4SF8                          | transmembrane 4 superfamily member 8       | 1,5E-3                                                            |         |
| EMT                             | CDH2                                       | cadherin 2, type 1, N-cadherin (neuronal)                         | 3,2E-3  |
|                                 | VIM                                        | vimentin                                                          | 7,1E-4  |
| Matrix<br>Metallo-<br>proteases | MMP10                                      | matrix metalloproteinase 10 (stromelysin 2)                       | 3,6E-3  |
|                                 | MMP11                                      | matrix metalloproteinase 11 (stromelysin 3)                       | 1,1E-4  |
|                                 | MMP12                                      | matrix metalloproteinase 12 (macrophage elastase)                 | 2,2E-3  |
|                                 | MMP23B                                     | matrix metalloproteinase 23B                                      | 2,0E-3  |

|                                     |                        |                                                             |        |
|-------------------------------------|------------------------|-------------------------------------------------------------|--------|
| Cytoskeletal<br>Related<br>Proteins | DSC2                   | desmocollin 2                                               | 1,6E-3 |
|                                     | ELMO1                  | engulfment and cell motility 1 (ced-12 homolog, C. elegans) | 4,7E-3 |
|                                     | EMP1                   | epithelial membrane protein 1                               | 4,8E-6 |
|                                     | ENG                    | endoglin (Osler-Rendu-Weber syndrome 1)                     | 5,0E-4 |
|                                     | EPLIN                  | epithelial protein lost in neoplasm beta                    | 9,7E-4 |
|                                     | EPN1                   | epsin 1                                                     | 2,2E-3 |
|                                     | FLNA                   | filamin A, alpha (actin binding protein 280)                | 9,6E-4 |
|                                     | GSN                    | gelsolin (amyloidosis, Finnish type)                        | 2,2E-3 |
|                                     | PACE-1                 | ezrin-binding partner PACE-1                                | 1,6E-3 |
|                                     | PXN                    | paxillin                                                    | 1,2E-3 |
|                                     | SVIL                   | supervillin                                                 | 1,9E-4 |
|                                     | THBS1                  | thrombospondin 1                                            | 3,8E-3 |
|                                     | PKP2                   | plakophilin 2                                               | 3,5E-7 |
| CFL1                                | cofilin 1 (non-muscle) | 1,0E-8                                                      |        |
| Other<br>Functions                  | CD2AP                  | CD2-associated protein                                      | 1,5E-3 |
|                                     | CD151                  | CD151 antigen                                               | 4,0E-3 |
|                                     | CTGF                   | connective tissue growth factor                             | 6,9E-4 |
|                                     | GAS8                   | growth arrest-specific 8                                    | 7,7E-4 |
|                                     | DACT1                  | dapper homolog 1, antagonist of beta-catenin (xenopus)      | 4,2E-3 |
|                                     | LIMS1                  | LIM and senescent cell antigen-like domains 1               | 1,2E-3 |
|                                     | PAK2                   | p21 (CDKN1A)-activated kinase 2                             | 9,1E-5 |
|                                     | WISP2                  | WNT1 inducible signaling pathway protein 2                  | 2,6E-4 |
|                                     | WASPIP                 | Wiskott-Aldrich syndrome protein interacting protein        | 2,5E-3 |

**Supplemental Table 3: Primer sequences in the coding sequences of genes**

| <b>Gene</b>    | <b>length(bp)</b> | <b>primer 1</b>           | <b>primer 2</b>            |
|----------------|-------------------|---------------------------|----------------------------|
| <b>ARHGDIB</b> | 372               | TTCCAATGTGACTGTTACCCG     | TGAGGTGGTCCTGTTTGTCTGTC    |
| <b>Rab36</b>   | 379               | ACAGCCTTTGACCTCACTGACG    | GCCTCTTGTTCTCCTGGGTTTTG    |
| <b>RAIN</b>    | 290               | ATTGGAGACCGCCAGCCAGAGAAC  | TTGGTGAGGTAGTAGACCGACTGC   |
| <b>RHOBTB3</b> | 331               | GCACGATGTGAAGTGATGGCTG    | TGAAAGGCAGTCTGAGTGGTG      |
| <b>RICS</b>    | 382               | CGCACGCACAGAACTAATCGG     | CAGCCATCTTGCTCTCCATTGTC    |
| <b>ITGB2</b>   | 184               | ATCCAGGAGCAGTCGTTTGTC     | CACAGTTTTTCCAATGTAGCCAG    |
| <b>PNN</b>     | 420               | GAATCTACTGTTGCTACTGAACGGC | CACCACCTGATGCTCTTTTTCC     |
| <b>PCDH10</b>  | 303               | CGCAAGAAGAACTCAGCAAGTC    | CCTTACCTCGTTGGACAAAATGC    |
| <b>CDH2</b>    | 375               | GACAATCCTCCAGAGTTTACTGCC  | AGGATTGGGGGCAAATAAGG       |
| <b>CDH1</b>    | 266               | GGAGAACGAGGAACCTTTGAG     | GCGTGAAAATGGCACCAGTC       |
| <b>OCN</b>     | 126               | GCCTCTTGAAAGTCCACCTCCTTAC | AAAGAGTAGGCTGGCTGAGAGAGAGC |
| <b>VIM</b>     | 351               | AAGAACACCCGCACCAACGAGAAG  | CGCATTGTCAACATCCTGTCTG     |
| <b>EPLIN</b>   | 326               | GGAGCAAAGGAGAATGTGCC      | TGTGAAACACCTGCTGGTTGG      |
| <b>FLNA</b>    | 259               | GGTCCTCGTCTTGTAAGCAACCAC  | TCTCTCACAGGGTGTCTTGG       |
| <b>MARCKS</b>  | 240               | GTCGCCTTCAAAGCAAATGGG     | GCCTCCGCAGCCTCCTTGTC       |
| <b>PTK2</b>    | 116               | GCACCATCCCTAACCATTGC      | GCCCCTCACCTTCTTTCTG        |
| <b>THBS1</b>   | 281               | ACACAGACAAAACGGGGAGG      | GGCATTAGGCACATAGGGACAG     |
| <b>WISP2</b>   | 334               | AGGAGAATACAGGTGCCAGGAAG   | TATCCACATCCCCGCAATGG       |
| <b>SNAIL</b>   | 137               | CAACCGTGCTTTTGCTGACC      | AGCCAGACTCTTGGTGCTTGTG     |
| <b>SLUG</b>    | 237               | CATTTCAACGCCTCCAAGAAGC    | ACTTACACGCCCAAGGATGAG      |

**Supplemental Table 4: Primer sequences in gene promoters for ChIP experiments**

| <b>Gene</b>           | <b>length<br/>(bp)</b> | <b>primer 1</b>               | <b>primer 2</b>                |
|-----------------------|------------------------|-------------------------------|--------------------------------|
| <b>ARHGDI1</b>        | 176                    | AGCCCGTGTGACGTG               | ACAAAGTAAAGCCGATGTGA           |
| <b>Rab36</b>          | 207                    | AGAACCTGCGCGAATCTCTCCACGGTCA  | ACCGGCGATCACCATAGCAACGAGAACCTG |
| <b>RAIN</b>           | 147                    | TTCACTTCCCTTTCAGAACGACAG      | TCAAGCCCACCATAAGCCAG           |
| <b>RHOBTB3</b>        | 226                    | AGTTGGTCTGCGGAGCTA            | AATTTGCTAATGTCGCCTTG           |
| <b>RICS</b>           | 201                    | TGCCCAAATATAATCTAAAC          | TACTCTTGTACGGAATG              |
| <b>ITGB2</b>          | 294                    | GGCCTGAGACCGTCACCAAGACCCCTTC  | GGCCCTCGGAAACAGCACAGCTACAGCCT  |
| <b>PNN</b>            | 251                    | CCGGAAGACAACGCTCATC           | GTTCCCGTTAGGCCCTTACC           |
| <b>PCDH10</b>         | 191                    | CTCACGGCTCGAAGCTAGGT          | GCGAAGCATAACGGAGTAGGG          |
| <b>CDH2</b>           | 191                    | TGTGAGCGTCTGCGAGTGTG          | AAACCACGAGCCCGAAACCT           |
| <b>CDH1</b>           | 138                    | CCTGTGAGCTTGCAGGAAAGTC        | GCAGCAGCGCCGAGAG               |
| <b>OCN</b>            | 233                    | GCTGCCATCATCTGAAATACCTC       | TAACTATCTGCATTGAAAGCGAACT      |
| <b>VIM</b>            | 278                    | CGGTGCAATCGTGATCTG            | GAGGGCTCCTAGCGGTTTAG           |
| <b>EPLIN</b>          | 103                    | AGCAGCACTGAGATTAGGCACAG       | TGGGGTGGATTGTTCTTCTTG          |
| <b>FLNA</b>           | 197                    | ATAGTGTCTTGCTGTGTTGCCAGGTTGGT | GGCAGCAGAAACAGGATCGCTCAGG      |
| <b>MARCKS</b>         | 141                    | GCAAACACACAAATCGCAACC         | TTGACTCGCATTGACTCTCGTCGG       |
| <b>PTK2</b>           | 170                    | ACAGCATAATCTGAACGGAACCTT      | TTTGTAGATCTGCCCTTTTGACATT      |
| <b>THBS1</b>          | 163                    | GTATCCACCTCTCGCCATCA          | TCGGCGCTCGTACTCTTG             |
| <b>WISP2</b>          | 190                    | GCAAAGGGGTTGTTTACTGAATGC      | TGTGTGTGTGTGAAAGCCTGAGC        |
| <b>CDH1-<br/>pGL3</b> | 156                    | CCTGTGAGCTTGCAGGAAAGTC        | AGCGGTCCATCTTCCAGCGGATAGA      |

**Supplemental Table 5: Primer sequences for scanning ChAP on Snail and Slug promoters**

| <b>Gene</b>  | <b>Primers</b> | <b>distance from transcription start site</b> | <b>length(bp)</b> | <b>primer 1</b>          | <b>primer 2</b>               |
|--------------|----------------|-----------------------------------------------|-------------------|--------------------------|-------------------------------|
| <b>Snail</b> | <b>A</b>       | -2256 to -2027                                | 229               | AATCAAGATGTGGGTGGGGG     | GTCGGTGGGCATAGTCACTTTG        |
|              | <b>B</b>       | -1863 to -1630                                | 233               | GAATGAAAGGAAGCCAGCGTG    | CTGTCTCAGAGTAAAAGCCAAAGTCC    |
|              | <b>C</b>       | -1431 to -1101                                | 330               | CGGCACCAAGTGACTAAACAGAC  | AGGCTGGCGGGAGAAAGAAG          |
|              | <b>D</b>       | -913 to -606                                  | 307               | CAGTTGCCACTTCTTCCCTCG    | CACCCGTTCCCTTCCCTTATCC        |
| <b>Slug</b>  | <b>A</b>       | -3257 to -3000                                | 258               | TGGGATTTTTTCAGCCTATGCC   | CTGGATGGGTGGGGTTTCTC          |
|              | <b>B</b>       | -2682 to -2389                                | 293               | CCTTCCTTTTGTCTTACCCGTGC  | GAAATCTTTGTGGAGGCAACTGC       |
|              | <b>C</b>       | -1987 to -1686                                | 301               | ACCCTCGGATACCTGCTGATG    | CACTCCATTTCCCACAAAACACAC      |
|              | <b>D</b>       | -1578 to -1378                                | 200               | CCAGTTTGTGTGTGGAGAAATCG  | ATGTGTGTTTGGAGGGTGAGGTGGGGCAC |
|              | <b>E</b>       | -789 to -478                                  | 311               | TCCAAATGACAGTTACCTCTTGCC | GAAAAAGGAAGGGGGAAGCG          |
